# Supplementary material for: Policymakers’ experience of a capacity-building intervention designed to increase their use of research: a realist process evaluation
Source: Springer Nature journal article supplement (doi:10.1186/s12961-017-0234-4), 2017-11-23
Supplement: MOESM3 [file 15249266]

**Additional file 3** Summary of SPIRIT intervention implementation fidelity

| Fidelity items                                          | Agency 1        |             | Agency 2                    |             | Agency 3                   |             | Agency 4                    |             | Agency 5               |             | Agency 6               |             |
|---------------------------------------------------------|-----------------|-------------|-----------------------------|-------------|----------------------------|-------------|-----------------------------|-------------|------------------------|-------------|------------------------|-------------|
| CEO emails espousing the value of research              | All sent by CEO |             | Some sent by liaison person |             | All sent by liaison person |             | Some sent by liaison person |             | All sent by CEO        |             | All sent by CEO        |             |
| Use of systems for commissioning research               | ✓ Rapid review  |             | ✓ Evaluation plan           |             | ✓ Rapid review             |             | ✓ Linked data analysis      |             | ✓ Evaluation plan      |             | ✓ Rapid review         |             |
| Provision of tools and resources                        | ✓               |             | ✓                           |             | ✓                          |             | ✓                           |             | ✓                      |             | ✓                      |             |
| Essential elements <sup>a</sup> delivered in workshops: | Content         | Interaction | Content                     | Interaction | Content                    | Interaction | Content                     | Interaction | Content                | Interaction | Content                | Interaction |
| - Introductory session                                  | Extensive       | Extensive   | Extensive                   | Moderate    | Extensive                  | Extensive   | Extensive                   | Moderate    | Extensive              | Extensive   | Extensive              | Limited     |
| - Audit & feedback 1                                    | Extensive       | Extensive   | Extensive                   | Extensive   | Extensive                  | Extensive   | Extensive                   | Extensive   | Extensive              | Extensive   | Extensive              | Extensive   |
| - Audit & feedback 2                                    | Extensive       | Extensive   | Extensive                   | Moderate    | Extensive                  | Moderate    | Extensive                   | Extensive   | Extensive              | Extensive   | Extensive              | Moderate    |
| - Skills seminar 1                                      | Moderate        | Moderate    | Moderate                    | Moderate    | Moderate                   | Extensive   | Moderate                    | Extensive   | Moderate               | Moderate    | Extensive              | Extensive   |
| - Skills seminar 2                                      | Extensive       | Extensive   | Extensive                   | Extensive   | Moderate                   | Limited     | Extensive                   | Extensive   | Moderate               | Moderate    | Extensive              | Moderate    |
| - Skills seminar 3                                      | Extensive       | Limited     | Moderate                    | Limited     | Moderate                   | Limited     | Moderate                    | Moderate    | Extensive              | Extensive   | Moderate               | Extensive   |
| - Leaders' program 1                                    | Moderate        | Limited     | Moderate                    | Moderate    | Moderate                   | Moderate    | Moderate                    | Moderate    | Moderate               | Moderate    | Unknown                | Unknown     |
| - Leaders' program 2                                    | Extensive       | Extensive   | Extensive                   | Extensive   | Extensive                  | Extensive   | Extensive                   | Extensive   | Extensive              | Extensive   | Extensive              | Extensive   |
| - Exchange forum 1                                      | Extensive       | Moderate    | Moderate                    | Limited     | Extensive                  | Limited     | Extensive                   | Extensive   | Extensive              | Extensive   | Moderate               | Limited     |
| - Exchange forum 2                                      | Extensive       | Moderate    | Moderate                    | Extensive   | Extensive                  | Extensive   | Moderate                    | Moderate    | N/A: e-bulletin chosen |             | Moderate               | Extensive   |
| - Exchange forum 3                                      | Extensive       | Extensive   | N/A: e-bulletin chosen      |             | N/A: e-bulletin chosen     |             | N/A: e-bulletin chosen      |             | N/A: e-bulletin chosen |             | N/A: e-bulletin chosen |             |
| Total number of activities delivered                    | 14              |             | 14                          |             | 14                         |             | 14                          |             | 14                     |             | 14                     |             |

<sup>a</sup>The essential elements for each workshop are clustered in two categories: *Content* includes the core topics, activities, messages and resources agreed with the agency, while *Interaction* includes how attendees participated in activities and, crucially, the extent to which they contributed to the content via discussion. Details about the methods and conduct of the fidelity assessment are provided elsewhere [59]
